# Supplementary material for: Intrathecal heat shock protein 60 mediates neurodegeneration and demyelination in the CNS through a TLR4- and MyD88-dependent pathway
Source: Springer Nature journal article supplement (doi:10.1186/s13024-015-0003-1), 2015-02-25
Supplement: MOESM2 [file 9776404]

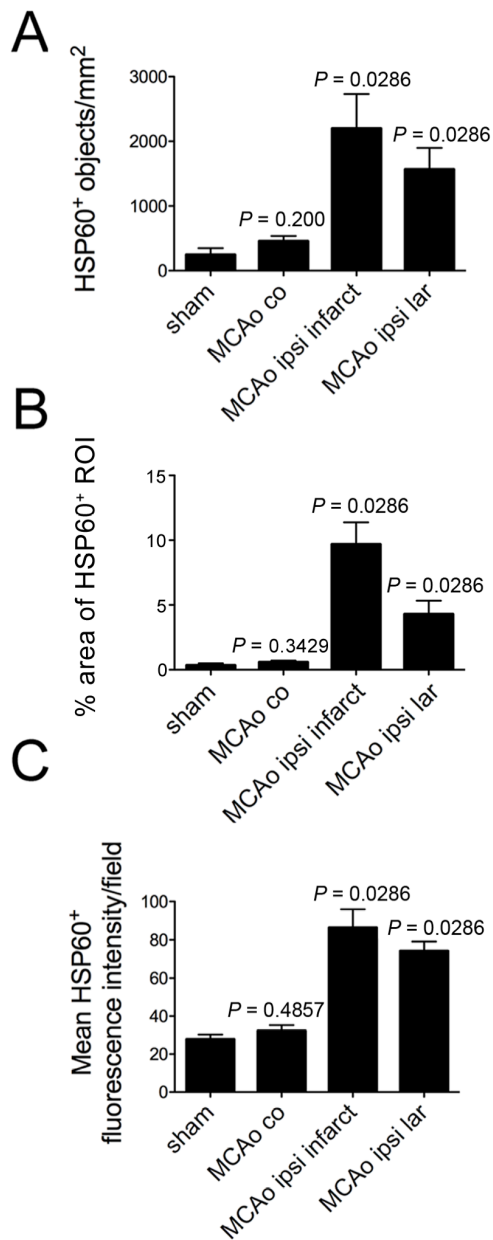

**Supplementary Figure 2. Stereological quantification and intensity analysis of HSP60 expression in the brain of mice treated with MCAo.** Ipsilateral area of infarct (ipsi), respective contralateral area (co), and lesion-associated region (lar) in brains of C57BL/6J mice treated with MCAo ( $n=4$ ) were immunostained after 1 d with an HSP60 antibody and with DAPI. Sham-operated animals served as a negative control ( $n=4$ ). Subsequently, stereological analysis was performed by (A) quantification of HSP60+ objects and (B) determination of the percentage of the area of HSP60+ ROI (region of interest). (C) Analysis

of mean HSP60+ fluorescence intensity in the brain regions of the animals named above. (A-  
C) Results are presented as mean +/- SD, Mann-Whitney *U* test for indicated groups.
